# Supplementary material for: Exposure to Microcystin-LR Promotes Colorectal Cancer Progression by Altering Gut Microbiota and Associated Metabolites in APCmin/+ Mice
Source: MDPI journal article supplement (doi:10.3390/toxins16050212), 2024-04-30
Supplement: s1 [file s1]

# Exposure to Microcystin-LR Promotes Colorectal Cancer Progression by Altering Gut Microbiota and Associated Metabolites in APC<sup>min/+</sup> Mice

Yuechi Song, Xiaochang Wang, Xiaohui Lu and Ting Wang

## Supplemental materials and methods

### *1.1. Detailed data analysis about gut microbiota*

PacBio raw reads underwent processing utilizing the SMRTLink analysis software (version 11.0) to acquire high-quality Hifi reads, ensuring a minimum of three complete passes and a 99% sequence accuracy. Subsequently, the Hifi reads underwent barcode identification and length filtration. In the context of the bacterial 16S rRNA gene, sequences with a length <1,000 or >1,800 bp were systematically eliminated. The Hifi reads were then subjected to clustering into operational taxonomic units (OTUs) through UPARSE 11, employing a 97% sequence similarity threshold. To minimize the effects of sequencing depth on alpha and beta diversity measure, the number of 16S rRNA gene sequences from each sample were rarefied to 8205. The taxonomic classification of each OTU representative sequence was carried out using RDP Classifier version 2.13 against the 16S rRNA gene database (Silva v138), employing a confidence threshold of 0.7.

### *1.2. Detailed data analysis about metabolomic profiling*

The pretreatment of LC/MS raw data was performed by Progenesis QI (Waters Corporation, Milford, USA) software, and a three-dimensional data matrix in CSV

format was exported. The information in this three-dimensional matrix included: sample information, metabolite name and mass spectral response intensity. Internal standard peaks, as well as any known false positive peaks (including noise, column bleed, and derivatized reagent peaks), were removed from the data matrix, de-redundant and peak pooled. At the same time, the metabolites were identified by searching database, and the main databases were the HMDB (<http://www.hmdb.ca/>), Metlin (<https://metlin.scripps.edu/>) and Majorbio Database.

The data underwent analysis using the freely accessible online platform of Majorbio Cloud ([cloud.majorbio.com](http://cloud.majorbio.com)). Metabolic features detected in no less than 80% of any set of samples were preserved. Following filtration, minimal metabolite values were imputed for specific samples in which the metabolite levels descended below the lower limit of quantitation. Subsequently, each metabolic feature underwent normalization by summation. To mitigate errors stemming from sample preparation and instrument instability, the response intensity of the sample mass spectrum peaks was normalized using the sum normalization method, culminating in the acquisition of the normalized data matrix. Simultaneously, variables exhibiting a relative standard deviation (RSD) greater than 30% of QC samples were excluded, and a logarithmic base 10 transformation was performed to derive the definitive data matrix for subsequent analysis.

The R package “ropls” (Version 1.6.2) was utilized for principal component analysis (PCA) and orthogonal least partial squares discriminant analysis (OPLS-DA), with a 7-cycle interactive validation for assessing model stability. Metabolites with  $VIP >$

1,  $P < 0.05$  were identified as significantly different metabolites based on the Variable Importance in the Projection (VIP) obtained from the OPLS-DA model and the p-value generated by a student's t-test. Data analysis encompassed multivariate statistical analysis, selection, and correlation of differential metabolites, GO and KEGG pathway enrichment. The association between differentially altered bacteria and metabolites was computed using Spearman rank correlation coefficients, and heatmaps were generated in the R platform (version 4.1.3).

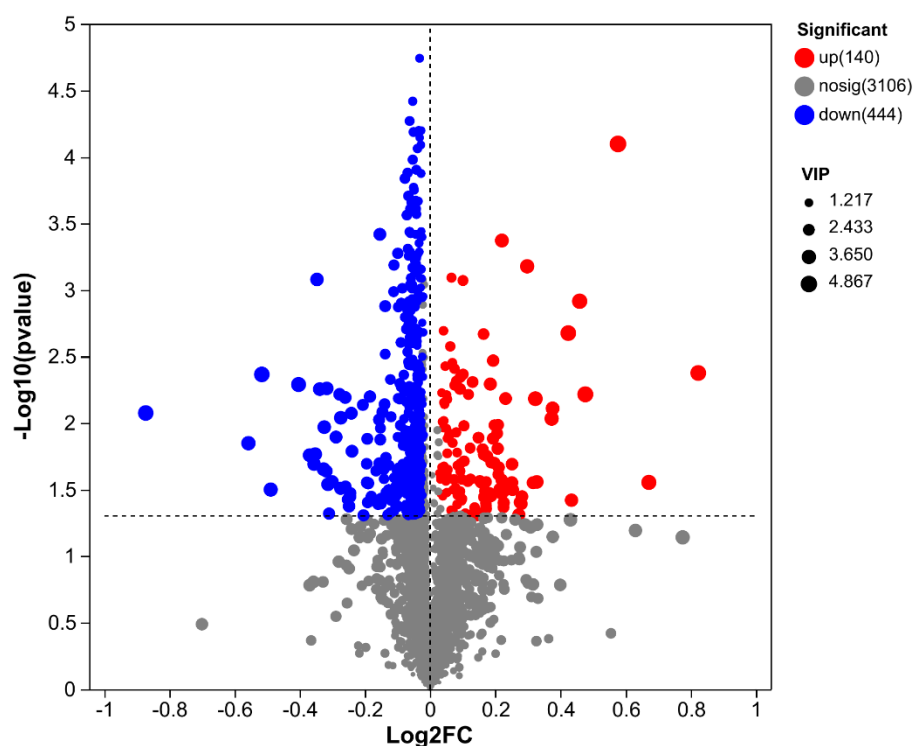

**Figure S1.** Volcano plot of differential metabolites in the intestinal contents of mice treated with MC-LR compared to the control group.

**Table S1.** Table of linear discriminant analysis results.

| Species name                                                                 | Group  | LDA value | P value |
|------------------------------------------------------------------------------|--------|-----------|---------|
| <i>g__Bifidobacterium</i>                                                    | APC    | 3.905     | 0.043   |
| <i>g__Bifidobacterium.s__Bifidobacterium_pseudolongum</i>                    | APC    | 3.846     | 0.043   |
| <i>g__Turicibacter</i>                                                       | APC    | 3.750     | 0.045   |
| <i>g__Turicibacter.s__Turicibacter_sp__LA61</i>                              | APC    | 3.745     | 0.045   |
| <i>g__Bifidobacterium.s__unclassified</i>                                    | APC    | 2.862     | 0.032   |
| <i>g__unclassified_f__Oscillospiraceae.s__unclassified</i>                   | APC    | 2.525     | 0.006   |
| <i>g__unclassified_f__Oscillospiraceae</i>                                   | APC    | 2.525     | 0.006   |
| <i>g__Faecalibaculum</i>                                                     | APC    | 2.523     | 0.017   |
| <i>g__Lachnoclostridium.s__unclassified</i>                                  | APC    | 2.469     | 0.004   |
| <i>g__Bifidobacterium.s__Bifidobacterium_pseudolongum_PV8-2</i>              | APC    | 2.456     | 0.013   |
| <i>g__Lachnoclostridium</i>                                                  | APC    | 2.301     | 0.045   |
| <i>o__Clostridia_UCG-014.s__uncultured_Escherichia_sp</i>                    | APC    | 2.256     | 0.011   |
| <i>g__Faecalibaculum.s__unclassified</i>                                     | APC    | 2.251     | 0.027   |
| <i>g__Lachnospiraceae_NK4A136_group.s__Clostridiales_bacterium_CIEAF_020</i> | APC    | 2.205     | 0.022   |
| <i>g__Lachnoclostridium.s__uncultured_bacterium</i>                          | APC    | 2.160     | 0.050   |
| <i>g__Faecalibaculum.s__Faecalibaculum_rodentium</i>                         | APC    | 2.156     | 0.035   |
| <i>g__Lysobacter</i>                                                         | APC    | 2.154     | 0.013   |
| <i>g__Thiobacillus</i>                                                       | APC    | 2.109     | 0.013   |
| <i>g__Thiobacillus.s__uncultured_bacterium</i>                               | APC    | 2.057     | 0.013   |
| <i>g__norank_f__Muribaculaceae.s__Gram-negative_bacterium_cTPY-13</i>        | APC    | 2.056     | 0.028   |
| <i>g__Lachnospiraceae_UCG-006.s__Clostridium_sp__ASF502</i>                  | APC    | 2.035     | 0.034   |
| <i>o__Clostridia_UCG-014.s__uncultured_rumen_bacterium</i>                   | APC_MC | 3.277     | 0.011   |
| <i>g__Odoribacter.s__unclassified</i>                                        | APC_MC | 2.805     | 0.044   |
| <i>g__Marvinbryantia</i>                                                     | APC_MC | 2.368     | 0.028   |
| <i>g__Marvinbryantia.s__Clostridiales_bacterium_CIEAF_012</i>                | APC_MC | 2.361     | 0.028   |
| <i>g__Gordonibacter</i>                                                      | APC_MC | 2.285     | 0.027   |
| <i>g__Gordonibacter.s__uncultured_bacterium</i>                              | APC_MC | 2.270     | 0.027   |
| <i>g__Family_XIII_AD3011_group</i>                                           | APC_MC | 2.246     | 0.007   |
| <i>f__Eubacterium_coprostanoligenes_group.s__unclassified</i>                | APC_MC | 2.235     | 0.037   |
| <i>g__Family_XIII_AD3011_group.s__uncultured_bacterium</i>                   | APC_MC | 2.209     | 0.003   |
| <i>g__Staphylococcus.s__unclassified</i>                                     | APC_MC | 2.199     | 0.037   |
| <i>g__Rikenella.s__Rikenella_microfus</i>                                    | APC_MC | 2.065     | 0.049   |

**Table S2.** The differential bacteria between MC-LR exposure and control groups.

| Species name                               | APC_Mean(%) | APC_MC_Mean(%) | P value  |
|--------------------------------------------|-------------|----------------|----------|
| <i>g__unclassified_f__Oscillospiraceae</i> | 0.2011      | 0.07556        | 0.007686 |
| <i>g__Family_XIII_AD3011_group</i>         | 0.002031    | 0.06094        | 0.00902  |
| <i>g__Thiobacillus</i>                     | 0.01422     | 0              | 0.01543  |
| <i>g__Lysobacter</i>                       | 0.01828     | 0              | 0.01572  |
| <i>g__Faecalibaculum</i>                   | 0.1727      | 0.02681        | 0.02127  |
| <i>g__Gordonibacter</i>                    | 0.01625     | 0.08531        | 0.03286  |
| <i>g__Marvinbryantia</i>                   | 0.04469     | 0.1146         | 0.03327  |
| <i>g__Lachnoclostridium</i>                | 0.08328     | 0.01706        | 0.04172  |

**Table S3.** The differential BAs in MC-LR exposed mice compared with control mice.

| Metab ID    | Metabolite                               | Regulate | VIP    | P value  |
|-------------|------------------------------------------|----------|--------|----------|
| metab_10126 | Alpha-Muricholic Acid                    | up       | 2.3489 | 0.005552 |
| metab_2888  | 7-Ketodeoxycholic acid                   | up       | 1.5108 | 0.01084  |
| metab_2767  | 12-Ketodeoxycholic acid                  | up       | 1.8354 | 0.01211  |
| metab_12167 | Bile acid                                | up       | 1.2479 | 0.02151  |
| metab_1389  | Taurocholic acid                         | up       | 1.223  | 0.02549  |
| metab_16468 | 7-Sulfocholic acid                       | up       | 2.6446 | 0.02677  |
| metab_14975 | Glycochenodeoxycholic acid 3-glucuronide | up       | 3.0679 | 0.03809  |
